# Supplementary material for: MHC Class I Stability is Modulated by Cell Surface Sialylation in Human Dendritic Cells
Source: PubMed Central journal article supplement (PMC7150992; doi:10.3390/pharmaceutics12030249), 2020-03-10
Supplement: pharmaceutics-12-00249-s001.pdf [file pharmaceutics-12-00249-s001.pdf]

# Supplementary Materials: MHC Class I Stability is Modulated by Cell Surface Sialylation in Human Dendritic Cells

Zélia Silva <sup>1,†</sup>, Tiago Ferro <sup>1,2,†</sup>, Danielle Almeida <sup>1</sup>, Helena Soares <sup>3</sup>, José Alexandre Ferreira <sup>4,5</sup>, Fanny M. Deschepper <sup>1</sup>, Paul J. Hensbergen <sup>6</sup>, Martina Pirro <sup>6</sup>, Sandra J. van Vliet <sup>7</sup>, Sebastian Springer <sup>8</sup> and Paula A. Videira <sup>1,2,\*</sup>

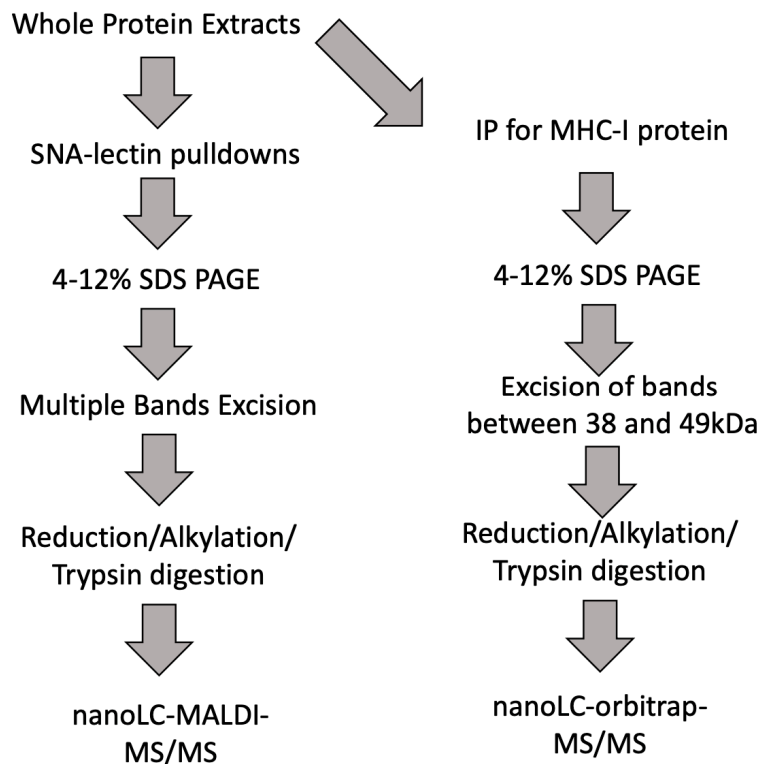

**Figure S1.** Ray diagram highlighting the key steps of the proteomics workflows used in this study.

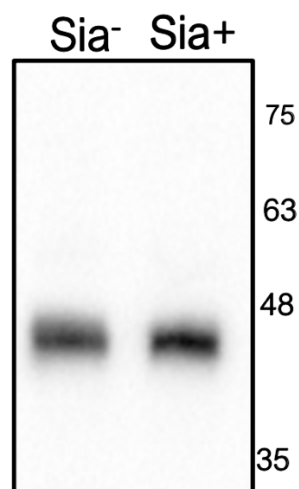

**Figure S2.** MHC-I heavy chain on human DCs is sialylated.

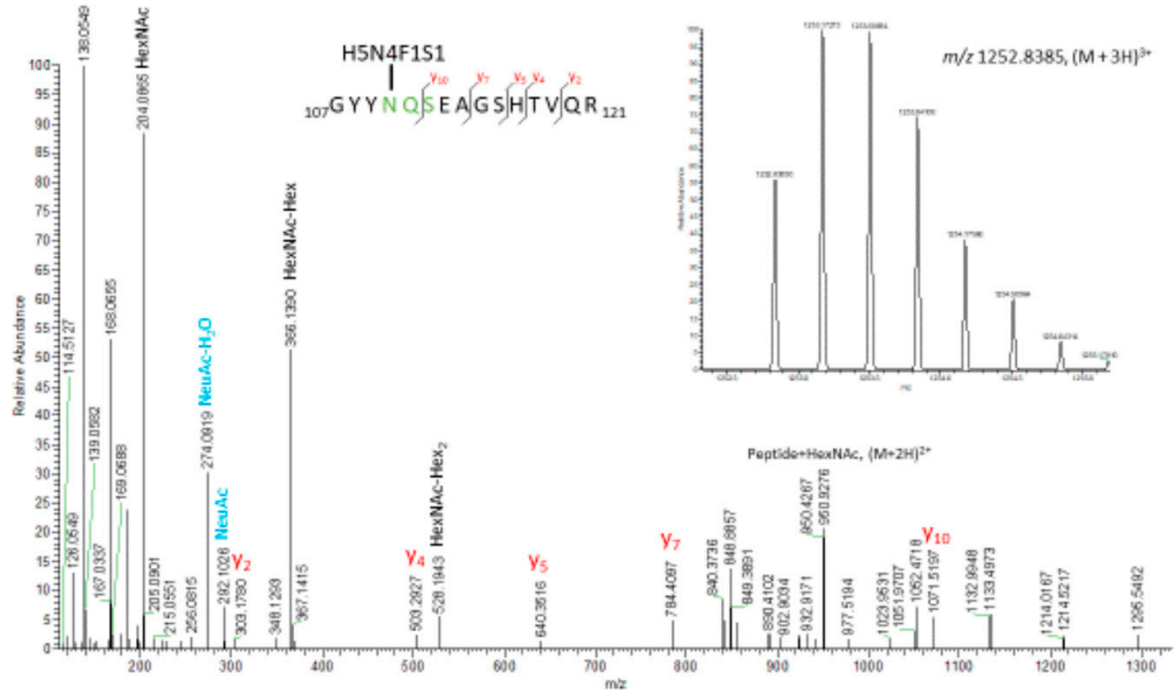

Figure S3. Sialylated glycopeptide from HLA-A.

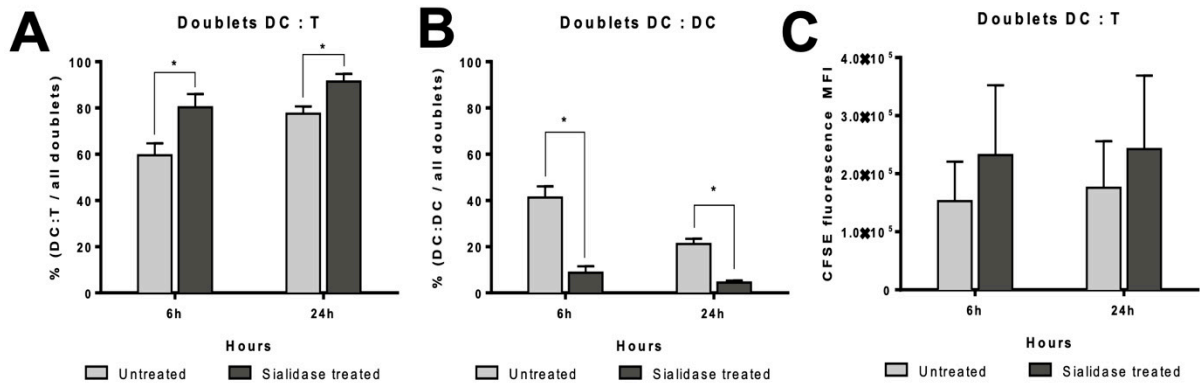

Figure S4. Co-culture of FarRed®-labeled desialylated DCs with CFSE-labeled autologous CD8<sup>+</sup> T cells.

**Table S1.** List of proteins identified by nano LC-MALDI-MS/MS on SNA column elution from human DCs.

| <b>Identified Proteins</b>                                | <b>Entry name</b> | <b>Molecular Weight (Da)</b> | <b>Sequence Coverage (%)</b> | <b>Protein Score*</b> |
|-----------------------------------------------------------|-------------------|------------------------------|------------------------------|-----------------------|
| HLA class I histocompatibility antigen, A-11 alpha chain  | 1A11_HUMAN        | 40937                        | 27                           | 438                   |
| HLA class I histocompatibility antigen, A-23 alpha chain  | 1A23_HUMAN        | 40733                        | 27                           | 438                   |
| HLA class I histocompatibility antigen, B-38 alpha chain  | 1B38_HUMAN        | 40416                        | 27                           | 455                   |
| HLA class I histocompatibility antigen, B-59 alpha chain  | 1B59_HUMAN        | 40584                        | 27                           | 387                   |
| HLA class I histocompatibility antigen, A-1 alpha chain   | 1A01_HUMAN        | 40846                        | 26                           | 380                   |
| HLA class I histocompatibility antigen, A-36 alpha chain  | 1A36_HUMAN        | 40934                        | 26                           | 380                   |
| HLA class I histocompatibility antigen, B-7 alpha chain   | 1B07_HUMAN        | 40460                        | 25                           | 443                   |
| HLA class I histocompatibility antigen, B-42 alpha chain  | 1B42_HUMAN        | 40333                        | 25                           | 443                   |
| HLA class I histocompatibility antigen, B-39 alpha chain  | 1B39_HUMAN        | 40328                        | 24                           | 396                   |
| HLA class I histocompatibility antigen, B-67 alpha chain  | 1B67_HUMAN        | 40342                        | 24                           | 396                   |
| HLA class I histocompatibility antigen, B-55 alpha chain  | 1B55_HUMAN        | 40496                        | 23                           | 328                   |
| HLA class I histocompatibility antigen, B-56 alpha chain  | 1B56_HUMAN        | 40478                        | 23                           | 328                   |
| HLA class I histocompatibility antigen, B-82 alpha chain  | 1B82_HUMAN        | 40421                        | 23                           | 328                   |
| HLA class I histocompatibility antigen, B-13 alpha chain  | 1B13_HUMAN        | 40474                        | 22                           | 366                   |
| HLA class I histocompatibility antigen, B-44 alpha chain  | 1B44_HUMAN        | 40481                        | 22                           | 366                   |
| HLA class I histocompatibility antigen, B-53 alpha chain  | 1B53_HUMAN        | 40495                        | 22                           | 366                   |
| HLA class I histocompatibility antigen, A-25 alpha chain  | 1A25_HUMAN        | 41218                        | 21                           | 328                   |
| HLA class I histocompatibility antigen, A-25 alpha chain  | 1A26_HUMAN        | 41218                        | 21                           | 328                   |
| HLA class I histocompatibility antigen, A-32 alpha chain  | 1A32_HUMAN        | 41048                        | 21                           | 298                   |
| HLA class I histocompatibility antigen, A-34 alpha chain  | 1A34_HUMAN        | 41055                        | 21                           | 328                   |
| HLA class I histocompatibility antigen, A-66 alpha chain  | 1A66_HUMAN        | 41082                        | 21                           | 238                   |
| HLA class I histocompatibility antigen, A-74 alpha chain  | 1A74_HUMAN        | 40891                        | 21                           | 292                   |
| HLA class I histocompatibility antigen, B-14 alpha chain  | 1B14_HUMAN        | 40358                        | 21                           | 337                   |
| HLA class I histocompatibility antigen, B-8 alpha chain   | 1B08_HUMAN        | 40331                        | 20                           | 361                   |
| HLA class I histocompatibility antigen, B-27 alpha chain  | 1B27_HUMAN        | 40428                        | 20                           | 314                   |
| HLA class I histocompatibility antigen, B-40 alpha chain  | 1B40_HUMAN        | 40505                        | 20                           | 400                   |
| HLA class I histocompatibility antigen, Cw-12 alpha chain | 1C12_HUMAN        | 40886                        | 20                           | 397                   |
| HLA class I histocompatibility antigen, Cw-15 alpha chain | 1C15_HUMAN        | 40863                        | 20                           | 397                   |
| HLA class I histocompatibility antigen, A-29 alpha chain  | 1A29_HUMAN        | 40863                        | 19                           | 203                   |
| HLA class I histocompatibility antigen, B-15 alpha chain  | 1B15_HUMAN        | 40388                        | 19                           | 307                   |
| HLA class I histocompatibility antigen, B-35 alpha chain  | 1B35_HUMAN        | 40455                        | 19                           | 307                   |
| HLA class I histocompatibility antigen, B-46 alpha chain  | 1B46_HUMAN        | 40440                        | 19                           | 307                   |
| HLA class I histocompatibility antigen, B-47 alpha chain  | 1B47_HUMAN        | 40571                        | 19                           | 307                   |
| HLA class I histocompatibility antigen, B-49 alpha chain  | 1B49_HUMAN        | 40581                        | 19                           | 353                   |
| HLA class I histocompatibility antigen, B-51 alpha chain  | 1B51_HUMAN        | 40566                        | 19                           | 307                   |
| HLA class I histocompatibility antigen, B-52 alpha chain  | 1B52_HUMAN        | 40521                        | 19                           | 307                   |

|                                                                |            |       |    |     |
|----------------------------------------------------------------|------------|-------|----|-----|
| HLA class I histocompatibility antigen, A-80 alpha chain       | 1A80_HUMAN | 40792 | 18 | 209 |
| HLA class I histocompatibility antigen, B-73 alpha chain       | 1B73_HUMAN | 40435 | 18 | 296 |
| HLA class I histocompatibility antigen, A-43 alpha chain       | 1A43_HUMAN | 41033 | 17 | 278 |
| HLA class I histocompatibility antigen, A-68 alpha chain       | 1A68_HUMAN | 40909 | 17 | 310 |
| HLA class I histocompatibility antigen, A-69 alpha chain       | 1A69_HUMAN | 40977 | 17 | 310 |
| HLA class I histocompatibility antigen, B-41 alpha chain       | 1B41_HUMAN | 40539 | 17 | 341 |
| HLA class I histocompatibility antigen, B-48 alpha chain       | 1B48_HUMAN | 40362 | 17 | 238 |
| HLA class I histocompatibility antigen, B-81 alpha chain       | 1B81_HUMAN | 40400 | 17 | 238 |
| HLA class I histocompatibility antigen, Cw-6 alpha chain       | 1C06_HUMAN | 40969 | 17 | 384 |
| HLA class I histocompatibility antigen, Cw-8 alpha chain       | 1C08_HUMAN | 40773 | 17 | 337 |
| T-cell surface glycoprotein CD1b                               | CD1B_HUMAN | 36939 | 17 | 268 |
| Putative HLA class I histocompatibility antigen, alpha chain H | HLAH_HUMAN | 40892 | 17 | 280 |
| HLA class I histocompatibility antigen, B-37 alpha chain       | 1B37_HUMAN | 40456 | 16 | 293 |
| HLA class I histocompatibility antigen, B-45 alpha chain       | 1B45_HUMAN | 40414 | 16 | 293 |
| HLA class I histocompatibility antigen, B-50 alpha chain       | 1B50_HUMAN | 40541 | 16 | 293 |
| HLA class I histocompatibility antigen, B-78 alpha chain       | 1B78_HUMAN | 40478 | 16 | 248 |
| HLA class I histocompatibility antigen, Cw-16 alpha chain      | 1C16_HUMAN | 40753 | 16 | 290 |
| HLA class I histocompatibility antigen, B-54 alpha chain       | 1B54_HUMAN | 40380 | 15 | 258 |
| HLA class I histocompatibility antigen, B-57 alpha chain       | 1B57_HUMAN | 40224 | 15 | 258 |
| HLA class I histocompatibility antigen, B-58 alpha chain       | 1B58_HUMAN | 40337 | 15 | 258 |
| HLA class I histocompatibility antigen, A-33 alpha chain       | 1A33_HUMAN | 40892 | 14 | 186 |
| HLA class I histocompatibility antigen, Cw-2 alpha chain       | 1C02_HUMAN | 41095 | 14 | 325 |
| HLA class I histocompatibility antigen, A-2 alpha chain        | 1A02_HUMAN | 40922 | 13 | 202 |
| HLA class I histocompatibility antigen, A-3 alpha chain        | 1A03_HUMAN | 40841 | 13 | 202 |
| HLA class I histocompatibility antigen, A-24 alpha chain       | 1A24_HUMAN | 40689 | 13 | 277 |
| HLA class I histocompatibility antigen, A-30 alpha chain       | 1A30_HUMAN | 40905 | 13 | 277 |
| HLA class I histocompatibility antigen, A-31 alpha chain       | 1A31_HUMAN | 41004 | 13 | 196 |
| HLA class I histocompatibility antigen, B-18 alpha chain       | 1B18_HUMAN | 40275 | 13 | 234 |
| HLA class I histocompatibility antigen, Cw-5 alpha chain       | 1C05_HUMAN | 40912 | 13 | 231 |
| HLA class I histocompatibility antigen, Cw-7 alpha chain       | 1C07_HUMAN | 40649 | 13 | 285 |
| HLA class I histocompatibility antigen, Cw-3 alpha chain       | 1C03_HUMAN | 40861 | 10 | 218 |
| HLA class I histocompatibility antigen, Cw-4 alpha chain       | 1C04_HUMAN | 40995 | 10 | 265 |
| HLA class I histocompatibility antigen, Cw-14 alpha chain      | 1C14_HUMAN | 40838 | 10 | 265 |
| HLA class I histocompatibility antigen, Cw-18 alpha chain      | 1C18_HUMAN | 40933 | 10 | 265 |
| HLA class I histocompatibility antigen, Cw-17 alpha chain      | 1C17_HUMAN | 41238 | 9  | 132 |
| HLA class I histocompatibility antigen, Cw-1 alpha chain       | 1C01_HUMAN | 40965 | 7  | 130 |
| T-cell surface glycoprotein CD1a                               | CD1A_HUMAN | 37077 | 7  | 148 |
| HLA class II histocompatibility antigen, DRB1-1 beta chain     | 2B11_HUMAN | 29914 | 5  | 35  |
| HLA class II histocompatibility antigen, DRB1-4 beta chain     | 2B14_HUMAN | 30112 | 5  | 35  |
| HLA class II histocompatibility antigen, DRB1-7 beta chain     | 2B17_HUMAN | 29822 | 5  | 35  |
| HLA class II histocompatibility antigen, DRB1-8 beta chain     | 2B18_HUMAN | 30004 | 5  | 35  |

|                                                             |             |        |   |     |
|-------------------------------------------------------------|-------------|--------|---|-----|
| HLA class II histocompatibility antigen, DRB1-9 beta chain  | 2B19_HUMAN  | 29826  | 5 | 35  |
| HLA class II histocompatibility antigen, DRB1-10 beta chain | 2B1A_HUMAN  | 30002  | 5 | 35  |
| HLA class II histocompatibility antigen, DRB1-11 beta chain | 2B1B_HUMAN  | 30160  | 5 | 35  |
| HLA class II histocompatibility antigen, DRB1-16 beta chain | 2B1G_HUMAN  | 30030  | 5 | 35  |
| T-cell surface glycoprotein CD1c                            | CD1C_HUMAN  | 37654  | 5 | 115 |
| HLA class II histocompatibility antigen, DR beta 3 chain    | DRB3_HUMAN  | 29962  | 5 | 35  |
| HLA class II histocompatibility antigen, DR beta 5 chain    | DRB5_HUMAN  | 30056  | 5 | 35  |
| Ig gamma-1 chain C region                                   | IGHG1_HUMAN | 36106  | 5 | 44  |
| Ig gamma-2 chain C region                                   | IGHG2_HUMAN | 36901  | 5 | 820 |
| Lymphocyte-specific protein 1                               | LSP1_HUMAN  | 37192  | 5 | 72  |
| HLA class I histocompatibility antigen, alpha chain E       | HLAE_HUMAN  | 40157  | 4 | 99  |
| HLA class I histocompatibility antigen, alpha chain G       | HLAG_HUMAN  | 38224  | 4 | 99  |
| Ig gamma-3 chain C region                                   | IGHG3_HUMAN | 41287  | 4 | 82  |
| HLA class I histocompatibility antigen, alpha chain F       | HLAF_HUMAN  | 39062  | 3 | 59  |
| CD44 antigen                                                | CD44_HUMAN  | 81538  | 2 | 67  |
| Integrin beta-2                                             | ITB2_HUMAN  | 84782  | 2 | 55  |
| Integrin alpha-M                                            | ITAM_HUMAN  | 127179 | 1 | 67  |

\* Significant protein scores ( $p < 0.05$ ).
